# Supplementary material
Source: PubMed Central journal article supplement (PMC2752561)
Supplement: 0904904106_0904904106SI.pdf [file 0904904106_0904904106SI.pdf]

# Supporting Information

Russell and Keiler 10.1073/pnas.0904904106

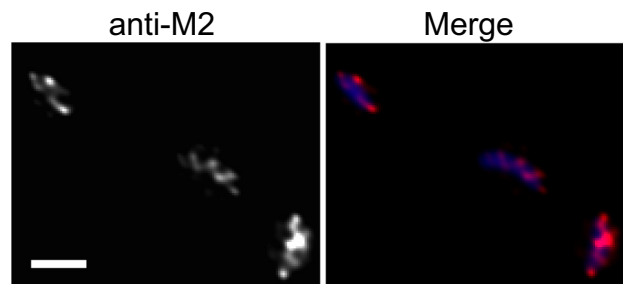

**Fig. S1.** SmpB-M2 is localized in a helical pattern. Localization of SmpB-M2 was observed in cells expressing SmpB-M2 using IFM with anti-FLAG M2-Cy3 antibody. Fluorescence signal from Cy3 (*Left*) and merged image of DAPI (blue) and Cy3 (magenta) signals (*Right*) are shown. Scale bar, 1  $\mu\text{m}$ .

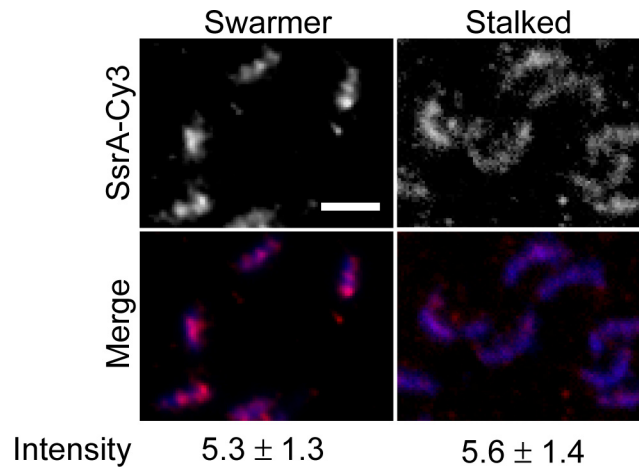

**Fig. S2.** tmRNA is not localized in  $\Delta vacB$  stalked cells. Swarmer and stalked cells lacking RNase R were sampled from synchronized cultures, and tmRNA localization was determined using FISH. Fluorescence signal from SsrA-Cy3 (Left) and merged image of DAPI (blue) and SsrA-Cy3 (magenta) signals (Right) are shown. Scale bar, 1  $\mu m$ . To determine the relative abundance of tmRNA in swarmer and stalked cells, the fluorescence intensity of the SsrA-Cy3 signal was quantified by measuring the average fluorescence intensity over the area of each cell. The average ( $n \geq 10$ ) and standard deviation are shown.

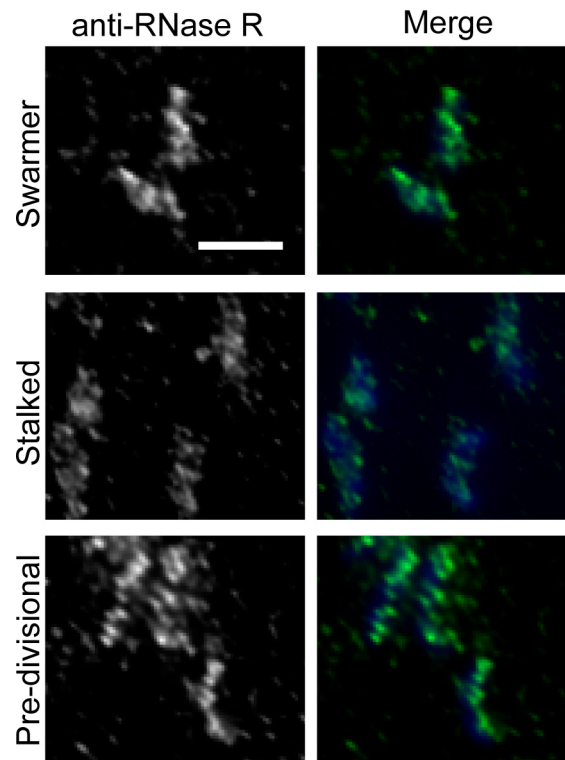

**Fig. S3.** RNase R localization does not change during the cell cycle. Cells were sampled from a synchronized culture of cells at 15 min (swarmer), 60 min (stalked), and 105 min (pre-divisional), and the localization of RNase R was determined using IFM with a RNase R antibody. Fluorescence signal from anti-RNase R (*Left*) and a merged image of DAPI (blue) and RNase R (green) signals (*Right*). Scale bar, 1  $\mu\text{m}$ .

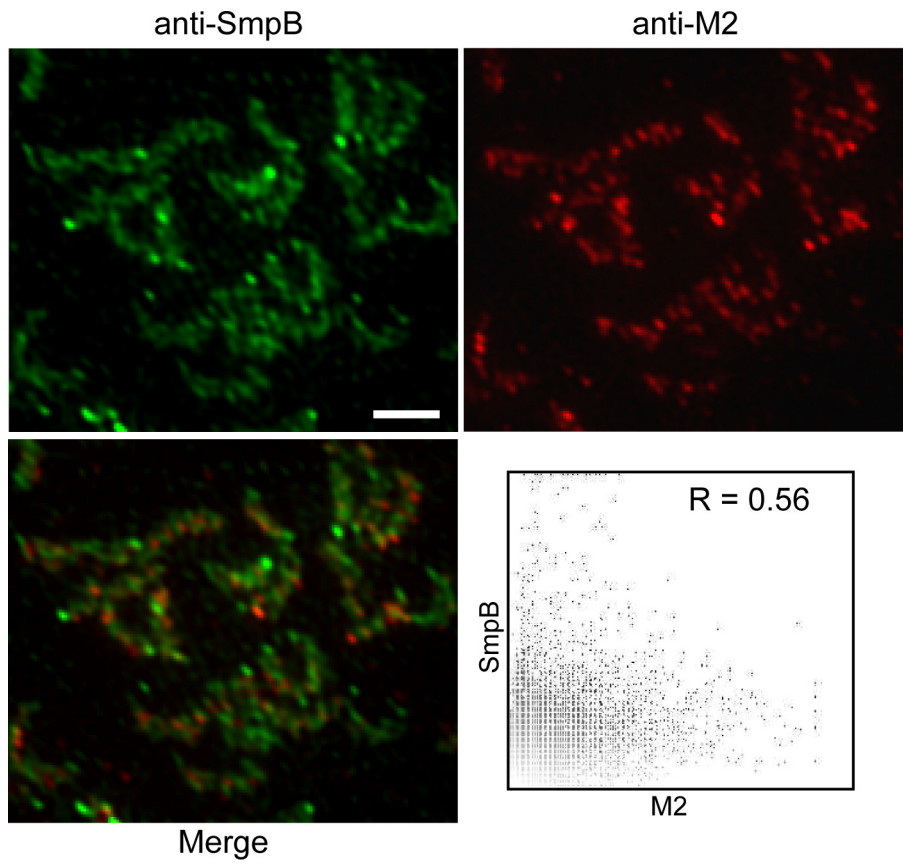

**Fig. S4.** RNase R and SmpB are localized in different patterns. Localization of SmpB (*Upper Left*, green) and RNase R-M2 (*Upper Right*, red) were detected in cells producing RNase R-M2 using IFM. Merged image (*Lower Left*) shows regions of overlap (yellow). For each pixel, the intensity from the SmpB channel was plotted versus the intensity from the RNase R-M2 channel (*Lower Right*), and the overlap coefficient (R) was calculated. Scale bar, 1  $\mu$ m.

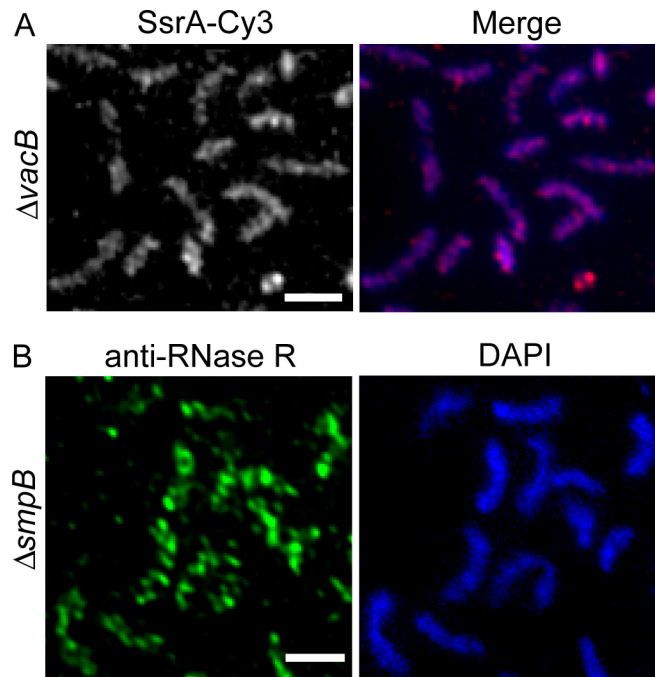

**Fig. 55.** RNase R localization is not dependent on tmRNA or SmpB. (A) tmRNA localization was determined using FISH in cells deleted for the gene encoding RNase R ( $\Delta vacB$ ). Fluorescence signal from SsrA-Cy3 (Left) and merged image of DAPI (blue) and SsrA-Cy3 (magenta) signal (Right) are shown. Scale bar, 1  $\mu\text{m}$ . (B) RNase R localization was determined using IFM in cells lacking SmpB. Fluorescence signal from RNase R (Left) and the same cells stained with DAPI (Right) are shown. Scale bar, 1  $\mu\text{m}$ .

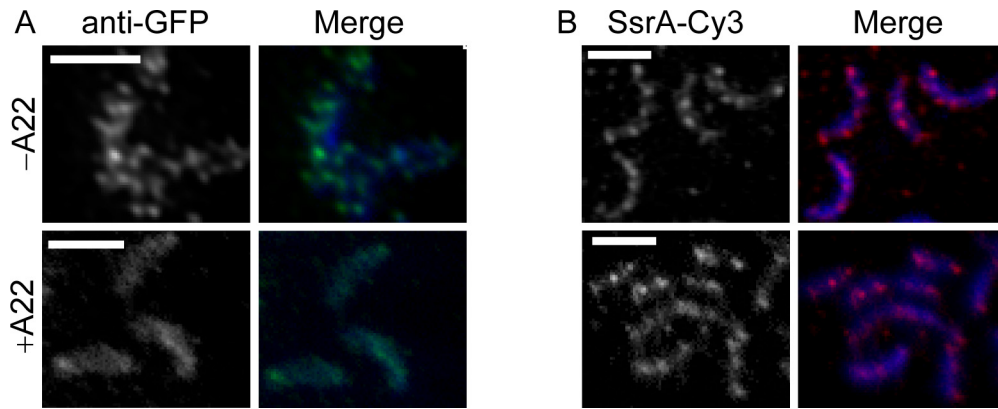

**Fig. S6.** tmRNA localization does not depend on the MreB helix. (A) Cells expressing MreB-GFP were analyzed for MreB localization in the absence (Top) and presence (Bottom) of the MreB inhibitor A22 using IFM. Fluorescence signal from MreB-GFP detected using an anti-GFP antibody (Left) and merged image (Right) of DAPI (blue) and MreB-GFP (green) are shown. (B) Cells analyzed for tmRNA localization using FISH in the absence (Top) and presence (Bottom) of the MreB inhibitor A22. Left Panels depict SsrA-Cy3 fluorescence signal; Right Panels are merged images of DAPI (blue) and SsrA-Cy3 (magenta). Scale bar, 1  $\mu$ m.
